# Supplementary material for: Solvation rules: aromatic interactions outcompete cation–π interactions in synthetic host–guest complexes in water
Source: Royal Society of Chemistry journal article supplement (doi:10.1039/d3cc04399a), 2023-01-01
Supplement: d3cc04399a1.pdf [file d3cc04399a1.pdf]

# Solvation Rules: Aromatic Interactions Outcompete Cation- $\pi$ Interactions in Synthetic Host-Guest Complexes in Water

Gloria Tobajas-Curiel,<sup>1</sup> Qingqing Sun,<sup>2,3</sup> Jeremy K. M. Sanders,<sup>1</sup> Pablo Ballester,<sup>2,4,\*</sup>  
Christopher A. Hunter<sup>1,\*</sup>

<sup>1</sup>Yusuf Hamied Department of Chemistry, University of Cambridge, Cambridge CB2 1EW, U.K. Email: herchelsmith.orgchem@ch.cam.ac.uk

<sup>2</sup>Institute of Chemical Research of Catalonia (ICIQ), Barcelona Institute of Science and Technology (BIST), Av. Països Catalans, 16, 43007, Tarragona, Spain. Email: pballester@iciq.es

<sup>3</sup>Yangzhou University, School of Chemistry and Chemical Engineering, Yangzhou, 225002 Jiangsu (China). Email: sunqingqing@snnu.edu.cn.

<sup>4</sup>ICREA, Passeig Lluís Companys 23, 08010, Barcelona, Spain.

## Supporting Information

|                                                             |    |
|-------------------------------------------------------------|----|
| 1. General methods .....                                    | 2  |
| 2. Synthesis .....                                          | 3  |
| 3. Isothermal titration calorimetry (ITC) experiments.....  | 5  |
| 4. Pairwise <sup>1</sup> H NMR competitive titrations ..... | 8  |
| 5. Error analysis.....                                      | 10 |
| 6. References .....                                         | 12 |

## 1. General methods

All the reagents and materials used in the synthesis of the compounds described below were obtained from commercial sources and used without prior purification. Compounds **1** and **2** were prepared as reported in literature.<sup>1,2</sup> Thin layer chromatography was carried out using Silica gel 60F on glass plates. Flash chromatography was carried out on an automated system (Combiflash Companion, Combiflash Rf+ or Combiflash Rf Lumen) using prepacked cartridges of silica (25  $\mu\text{m}$  or 50 $\mu\text{m}$  PuriFlash® Columns). <sup>1</sup>H and <sup>13</sup>C NMR spectra were recorded on Bruker 400 MHz DPX400, 400 MHz AVIII400, 500 MHz DCH cryoprobe or 500 MHz TCI Cryoprobe spectrometer at 298.0  $\pm$  0.1 K unless specifically stated otherwise. Residual solvent was used as an internal standard for referencing. In chloroform-*d*, <sup>1</sup>H spectra were referenced to  $\delta$  7.26 ppm and <sup>13</sup>C spectra to  $\delta$  77.06 ppm for the solvent signal. In dimethyl sulfoxide-*d*<sub>6</sub>, <sup>1</sup>H spectra were referenced to  $\delta$  2.50 ppm and <sup>13</sup>C spectra to  $\delta$  39.52 ppm. In deuterium oxide, <sup>1</sup>H spectra were referenced to  $\delta$  4.79 ppm. All chemical shifts are quoted in ppm on the  $\delta$  scale and the coupling constants expressed in Hz. Signal splitting patterns are described as follows: s (singlet), br s (broad singlet), d (doublet), t (triplet), q (quartet), m (multiplet). FT-IR spectra were recorded on a PerkinElmer Spectrum One FT-IR spectrometer equipped with an ATR cell. The LCMS analysis of samples was performed using a Waters Acquity H-Class UPLC coupled with a single quadrupole Waters SQD2 or a Waters Xevo G2-S bench top QTOF machine. Melting points were measured on a Mettler Toledo MP90 melting point apparatus. ITC titrations were carried out on a Malvern MicroCal VP-ITC MicroCalorimeter.

## 2. Synthesis

### 1'-Methyl-[4,4'-bipyridin]-1'-ium 1-oxide iodide (5)

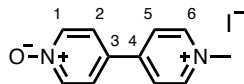

4-Phenylpyridine *N*-oxide (34 mg, 0.20 mmol, 1 equivalent) was dissolved in acetonitrile (2 mL) and iodomethane (0.1 mL, 1.5 mmol, 7.5 equivalents) was added. The flask was sealed, and the mixture stirred at 50 °C for 16 h. The volatiles were evaporated off under to yield 1'-methyl-[4,4'-bipyridin]-1'-ium 1-oxide iodide (51 mg, 0.16 mmol, 82 %) as a yellow solid.

**Mpt:** 225.0 – 226.2 °C

**<sup>1</sup>H NMR (400 MHz, DMSO-*d*<sub>6</sub>):** δ<sub>H</sub> 9.05 (d, *J* = 7.0 Hz, 2H, H-6), 8.56 (d, *J* = 7.0 Hz, 2H, H-5), 8.48 (d, *J* = 7.4 Hz, 2H, H-1), 8.17 (d, *J* = 7.4 Hz, 2H, H-2), 4.32 (s, 3H, H-2, CH<sub>3</sub>).

**<sup>13</sup>C NMR (101 MHz, DMSO-*d*<sub>6</sub>):** δ<sub>C</sub> 150.3 (C-4), 146.3 (C-6), 140.2 (C-1), 129.3 (C-3), 125.7 (C-2), 124.1 (C-5), 47.7 (CH<sub>3</sub>).

**HRMS (ES<sup>+</sup>):** calculated for C<sub>11</sub>H<sub>11</sub>IN<sub>2</sub>O 187.0866 [M<sup>+</sup>], found 187.0861 [M<sup>+</sup>].

**FT-IR (ATR):** ν<sub>max</sub> 2970, 1738, 1366, 1217, 831, 687, 539, 496 cm<sup>-1</sup>.

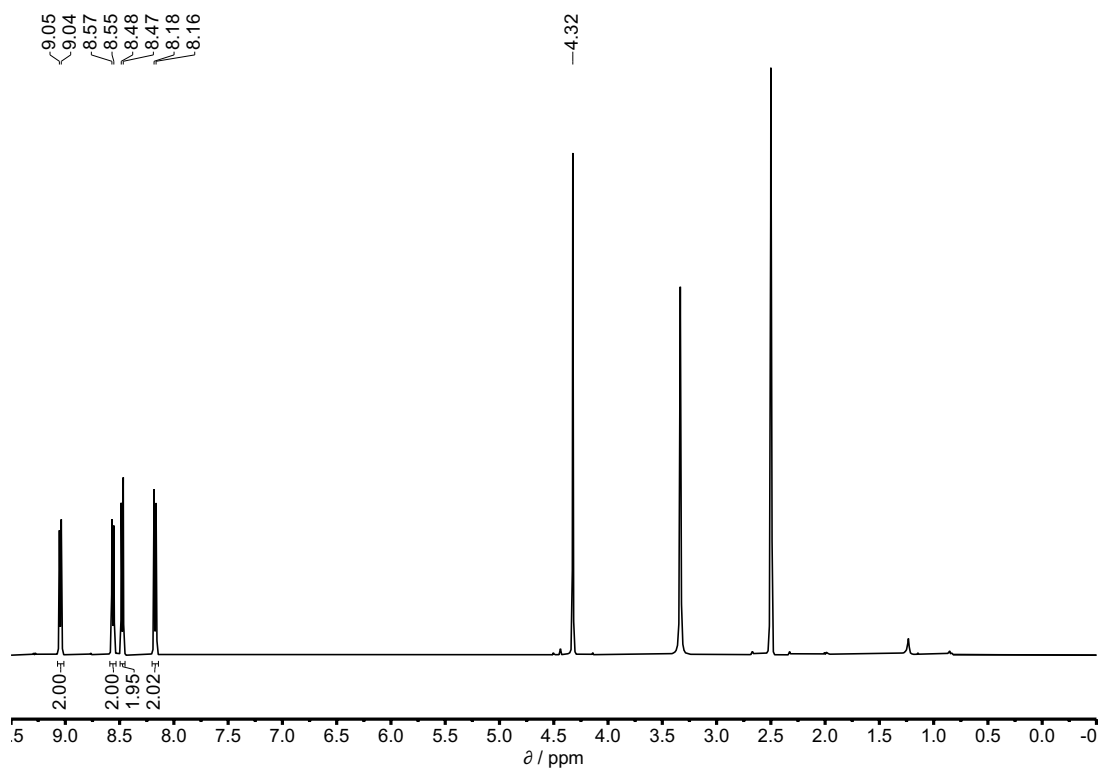

**Figure S1.**  $^1\text{H}$  NMR spectrum (400 MHz,  $\text{DMSO-d}_6$ ) of compound **5**.

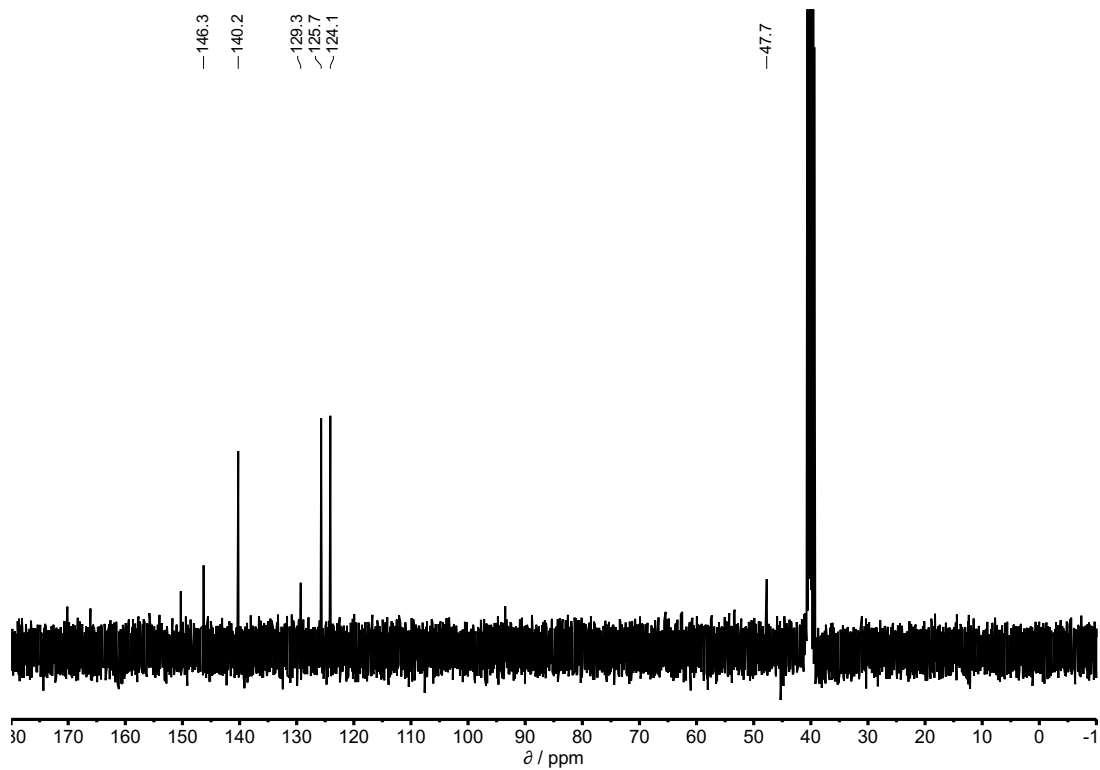

**Figure S2.**  $^{13}\text{C}$  NMR spectrum (101 MHz,  $\text{DMSO-d}_6$ ) of compound **5**.

### 3. Isothermal titration calorimetry (ITC) experiments

In a typical ITC experiment, the host (**2**) was dissolved in HPLC grade water with a concentration 30-40 times the expected dissociation constant, and the solution was loaded into the sample cell of the microcalorimeter. A 7-10 times more concentrated solution of guest (**3-6**) was loaded into the injection syringe. The number of injections was 35, and the volume of the injections was 8  $\mu\text{L}$ . The thermogram peaks were integrated and thermodynamic parameters were calculated using the MicroCal PEAQ-ITC Analysis Software which uses the least-squares minimisation to obtain globally minimised parameters. In all cases the data fitted well to a simple 1:1 binding model. Blank experiments on the guests showed no self-association.

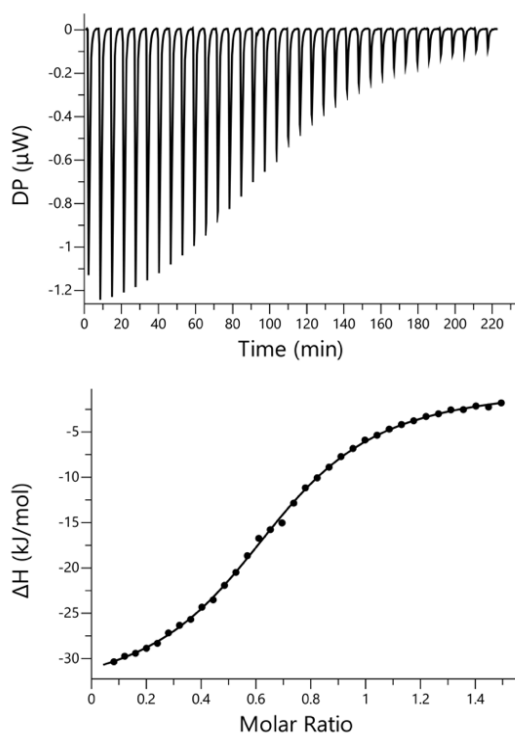

**Figure S3.** ITC data for titration of **3** (0.28 mM) into **2** (0.04 mM) in water at 298 K. The raw data for each injection is shown (differential power, DP), along with the least-squares-fit of the enthalpy change per mole of guest ( $\Delta H$ ) to a 1:1 binding isotherm.

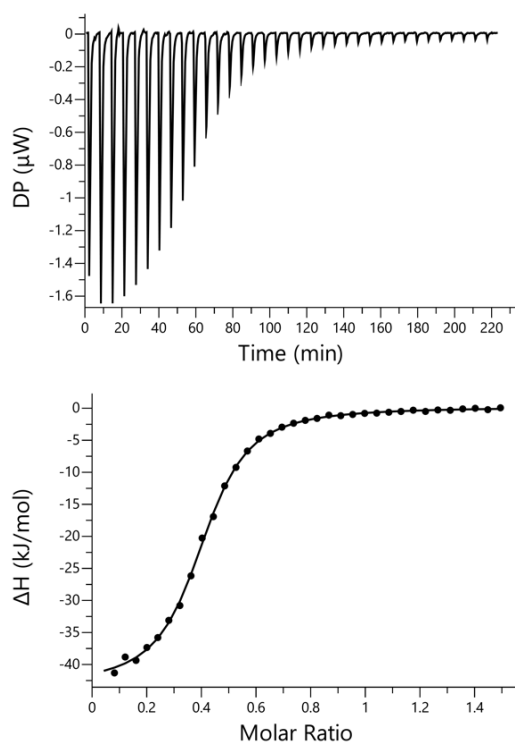

**Figure S4.** ITC data for titration of **4** (0.28 mM) into **2** (0.04 mM) in water at 298 K. The raw data for each injection is shown (differential power, DP), along with the least-squares-fit of the enthalpy change per mole of guest ( $\Delta H$ ) to a 1:1 binding isotherm.

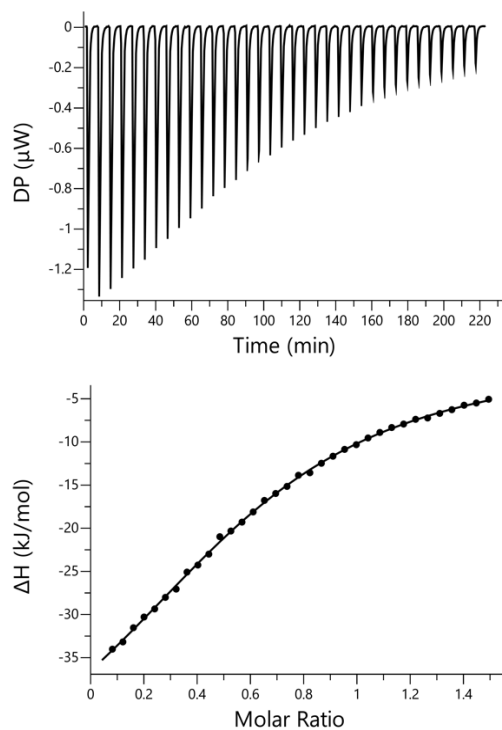

**Figure S5.** ITC data for titration of **5** (0.28 mM) into **2** (0.04 mM) in water at 298 K. The raw data for each injection is shown (differential power, DP), along with the least-squares-fit of the enthalpy change per mole of guest ( $\Delta H$ ) to a 1:1 binding isotherm.

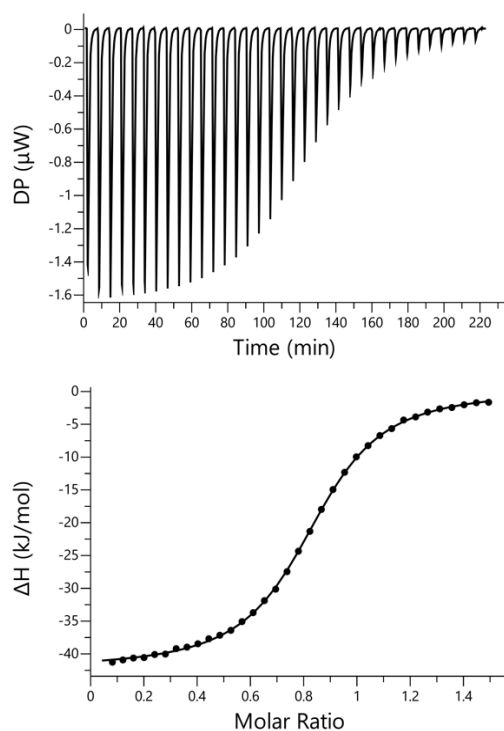

**Figure S6.** ITC data for titration of **6** (0.28 mM) into **2** (0.04 mM) in water at 298 K. The raw data for each injection is shown (differential power, DP), along with the least-squares-fit of the enthalpy change per mole of guest ( $\Delta H$ ) to a 1:1 binding isotherm.

**Table S1.** Thermodynamic parameters for formation of 1:1 complexes with host **2** in water at 298 K.<sup>a</sup>

| Guest                 | $K / M^{-1}$              | $\Delta G^\circ / kJ mol^{-1}$ | $\Delta H^\circ / kJ mol^{-1}$ | $\Delta S^\circ / kJ mol^{-1}$ | $N$           |
|-----------------------|---------------------------|--------------------------------|--------------------------------|--------------------------------|---------------|
| <b>3</b> <sup>d</sup> | $3.3 \pm 0.6 \times 10^5$ | $-31.5 \pm 0.4$                | $-34.3 \pm 0.3$                | $2.8 \pm 0.6$                  | $0.7 \pm 0.0$ |
| <b>4</b> <sup>d</sup> | $1.4 \pm 0.1 \times 10^6$ | $-35.0 \pm 0.2$                | $-43.6 \pm 2.2$                | $8.6 \pm 2.3$                  | $0.8 \pm 0.0$ |
| <b>5</b>              | $7.6 \pm 0.2 \times 10^4$ | $-27.9 \pm 0.1$                | $-54.2 \pm 0.0$                | $26.3 \pm 0.0$                 | $0.6 \pm 0.0$ |
| <b>6</b>              | $1.1 \pm 0.1 \times 10^6$ | $-34.5 \pm 0.1$                | $-42.2 \pm 0.6$                | $7.9 \pm 0.7$                  | $0.8 \pm 0.0$ |

<sup>a</sup> Errors are quoted as twice the standard deviation of at least three measurements.

#### 4. Pairwise $^1\text{H}$ NMR competitive titrations

Competitive titration experiments were performed using calix[4]pyrrole **1**, and pyridine *N*-oxides **5** and **6** in non-buffered deuterium oxide. The association constant ratios between two competing complexes were determined by integrating selected proton signals in the acquired  $^1\text{H}$  NMR spectra.

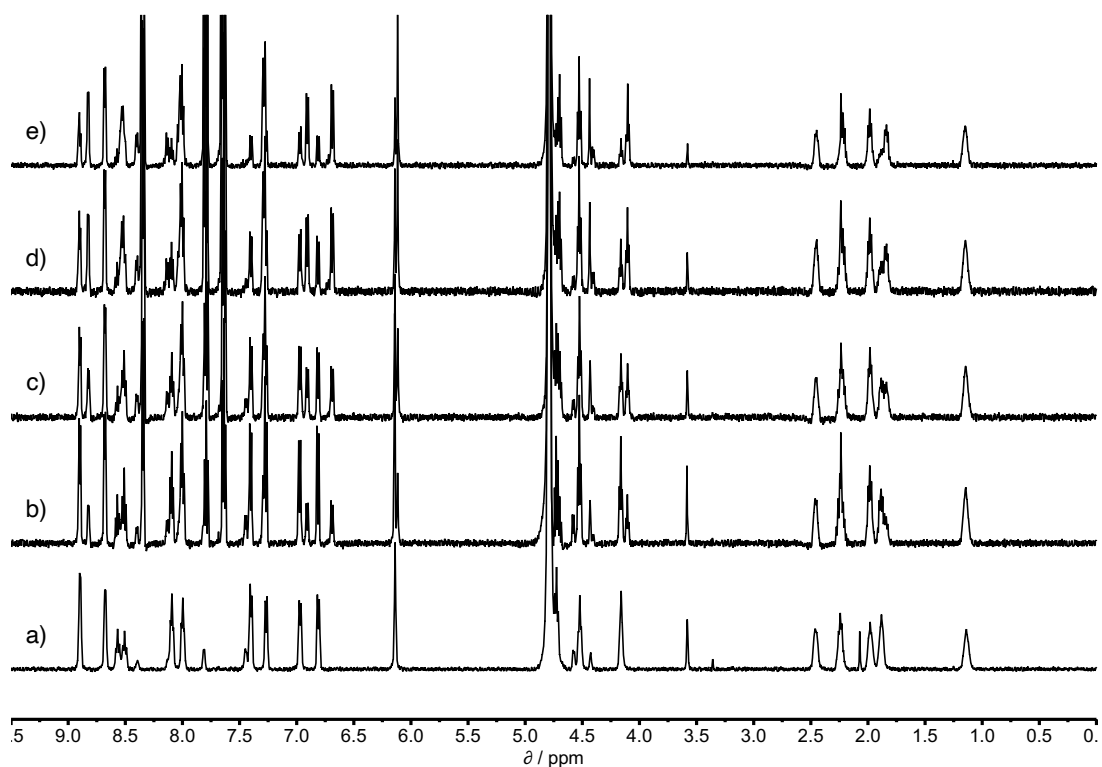

**Figure S7.** 500MHz  $^1\text{H}$  NMR for titration of **3** into a mixture of **1** and **5** in  $\text{D}_2\text{O}$  at 298K. Concentrations are: a) **1**: 0.45 mM; **3**: 0 mM; **5**: 0.47 mM; b) **1**: 0.40 mM; **3**: 1.91 mM; **5**: 0.42 mM; c) **1**: 0.36 mM; **3**: 3.62 mM; **5**: 0.38 mM; d) **1**: 0.303 mM; **3**: 6.18 mM; **5**: 0.32 mM; e) **1**: 0.25 mM; **3**: 8.73 mM; **5**: 0.25 mM. Integration of selected proton signals indicated that  $K(\mathbf{1}\cdot\mathbf{5}) = 21.1 \pm 10 \times K(\mathbf{1}\cdot\mathbf{3})$ .



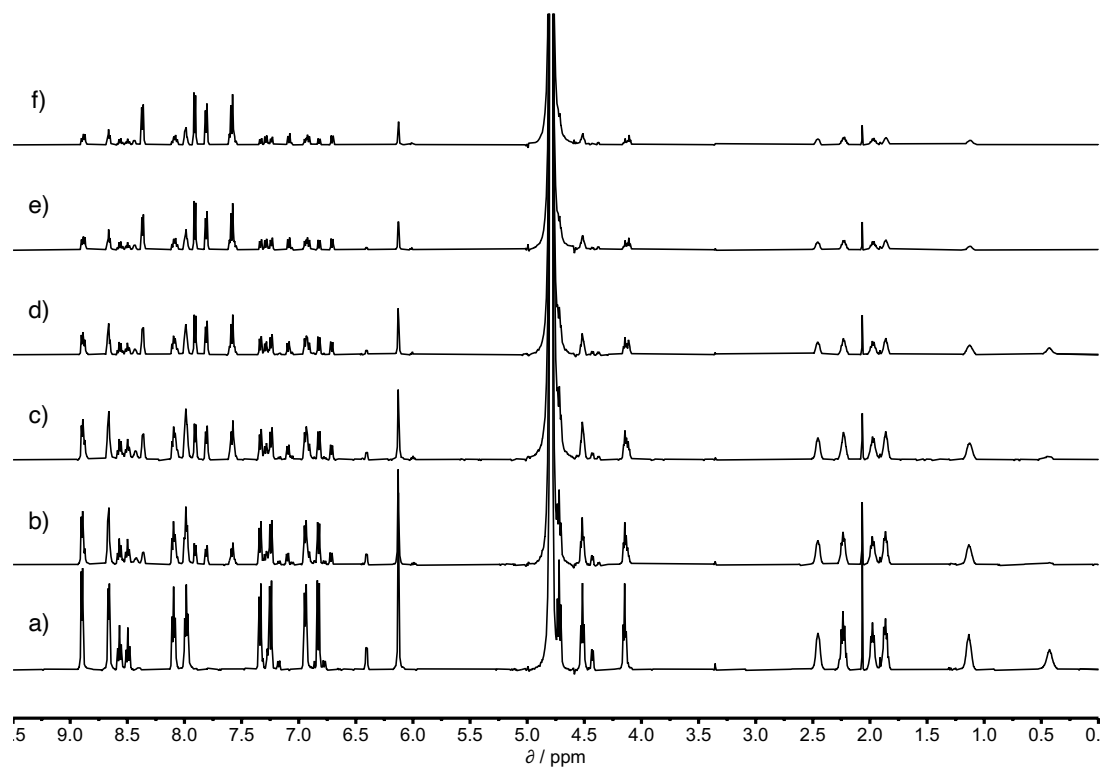

**Figure S8.** 500MHz  $^1\text{H}$  NMR for titration of phenylpyridine *N*-oxide (**PPNO**) into a mixture of **1** and **6** in  $\text{D}_2\text{O}$  at 298K. Concentrations are: a) **1**: 0.50 mM; **PPNO**: 0 mM; **6**: 0.58 mM; b) **1**: 0.37 mM; **PPNO**: 0.42 mM; **6**: 0.43 mM; c) **1**: 0.29 mM; **PPNO**: 0.67 mM; **6**: 0.34 mM; d) **1**: 0.24 mM; **PPNO**: 0.83 mM; **6**: 0.28 mM; e) **1**: 0.18 mM; **PPNO**: 1.03 mM; **6**: 0.21 mM; f) **1**: 0.14 mM; **PPNO**: 1.15 mM; **6**: 0.17 mM. Integration of selected proton signals indicated that  $K(\mathbf{1}\cdot\mathbf{6}) = 7.1 \pm 0.4 \times K(\mathbf{1}\cdot\mathbf{PPNO})^{\text{a}}$ .

<sup>a</sup>  $K(\mathbf{1}\cdot\mathbf{PPNO})$  value reported previously in reference 2.

## 5. Error analysis

The propagation of errors ( $S$ ) through  $\Delta G^\circ$  and the DMC  $\Delta\Delta G^\circ$  has been calculated as follows:

$$S_{\Delta G^\circ} = RT \left( \frac{S_K}{K} \right) \quad \text{Eq. (1)}$$

where  $K$  is the experimentally measured association constant with an error of  $S_K$ .

$$S_{\Delta\Delta G^\circ} = \sqrt{S_{\Delta G^\circ A}^2 + S_{\Delta G^\circ B}^2 + S_{\Delta G^\circ C}^2 + S_{\Delta G^\circ D}^2} \quad \text{Eq. (2)}$$

## Complexation-induced $^1\text{H}$ NMR chemical shifts

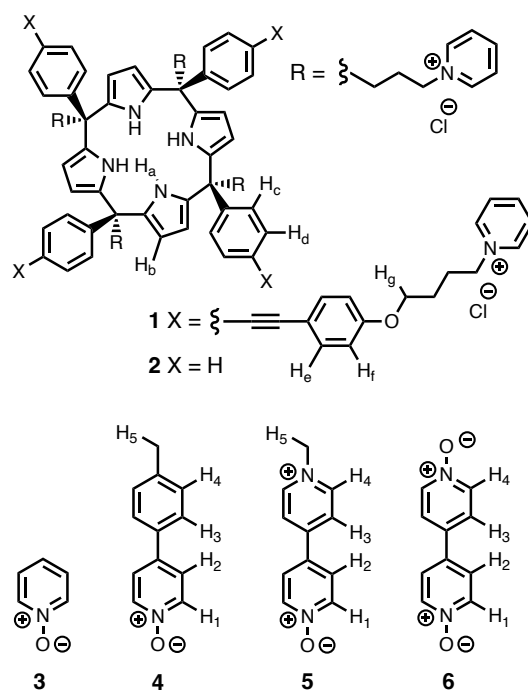

**Figure S9.**  $^1\text{H}$  NMR proton labelling scheme.

**Table S2.** Differences between the  $^1\text{H}$  NMR chemical shifts ( $\Delta\delta$  in ppm) of the host signals in 1:1 complexes compared with the  $1\cdot 3$  complex in deuterium oxide at 298 K.<sup>a</sup>

| Complex                 | H <sub>a</sub> | H <sub>b</sub> | H <sub>c</sub> | H <sub>d</sub> | H <sub>e</sub> | H <sub>f</sub> | H <sub>g</sub> |
|-------------------------|----------------|----------------|----------------|----------------|----------------|----------------|----------------|
| $1\cdot 4$ <sup>b</sup> | n.d.           | 0.0            | 0.0            | 0.0            | 0.0            | 0.0            | 0.0            |
| $1\cdot 5$              | n.d.           | 0.0            | +0.1           | +0.1           | +0.2           | +0.1           | 0.0            |
| $1\cdot 6$              | n.d.           | 0.0            | 0.0            | 0.0            | 0.0            | 0.0            | 0.0            |

<sup>a</sup> n.d. values could not be determined. <sup>b</sup> Values reported previously in reference 3.

**Table S3.** Limiting complexation-induced changes in  $^1\text{H}$  NMR chemical shift ( $\Delta\delta$  in ppm) for the guest signals in complex **A** of the DMC in deuterium oxide at 298 K.

| Complex                 | H <sub>1</sub> | H <sub>2</sub> | H <sub>3</sub> | H <sub>4</sub> | H <sub>5</sub> |
|-------------------------|----------------|----------------|----------------|----------------|----------------|
| $1\cdot 4$ <sup>a</sup> | -4.0           | -0.7           | -0.9           | -1.9           | -0.8           |
| $1\cdot 5$              | -4.0           | -0.7           | n.d.           | -1.1           | -0.9           |
| $1\cdot 6$              | -4.0           | -0.7           | -1.0           | -2.0           | -              |

<sup>a</sup> Values reported previously in reference 3.<sup>3</sup>

## 6. References

- 1 L. Escobar, A. Díaz-Moscoso and P. Ballester, *Chem. Sci.*, 2018, **9**, 7186–7192.
- 2 L. Escobar and P. Ballester, *Org. Chem. Front.*, 2019, **6**, 1738–1748.
- 3 G. Tobajas-Curiel, Q. Sun, J. K. M. Sanders, P. Ballester and C. A. Hunter, *Chem. Sci.*, 2023, **14**, 6226–6236.
